# Supplementary material for: Exosomal CD73 from serum of patients with melanoma suppresses lymphocyte functions and is associated with therapy resistance to anti-PD-1 agents
Source: HighWire-hosted journal article supplement (doi:10.1136/jitc-2021-004043), 2022-03-01
Supplement: jitc-2021-004043supp002_data_supplement.pdf [file jitc-2021-004043supp002_data_supplement.pdf]

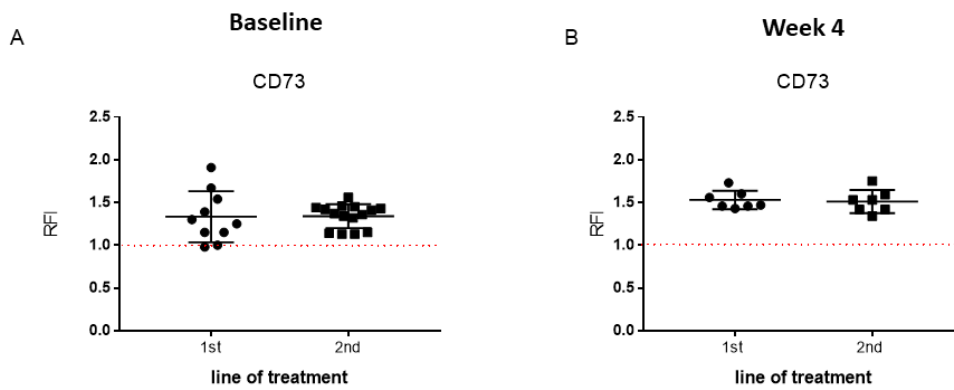

**Online Supplemental Figure 2.** A) Expression levels of exosomal CD73 as RFI values at baseline in patients treated in first line (n=10) or in second line (n=15) with anti-PD-1 blocking antibody monotherapy. B) Expression levels of exosomal CD73 as RFI values at week 4 in patients treated in first line (n=7) or in second line (n=7) with anti-PD-1 blocking antibody monotherapy.
